# Supplementary material
Source: PubMed Central journal article supplement (PMC11065414)

# Intracellular-Cytokine-Gating-Hierarchy

**a** Figures 3c,d and 4c,d and Extended-Data-Figures-6b and 7

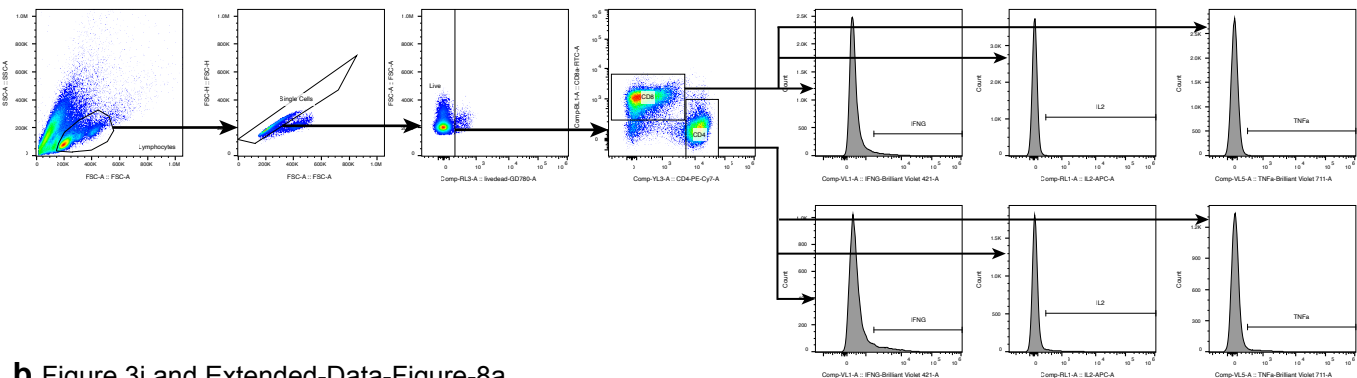

**b** Figure 3i and Extended-Data-Figure-8a

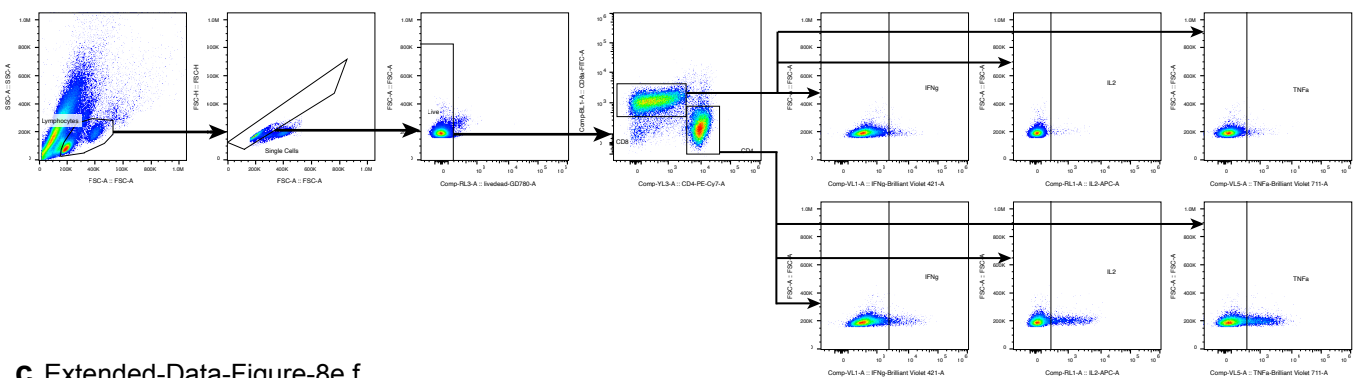

**c** Extended-Data-Figure-8e,f

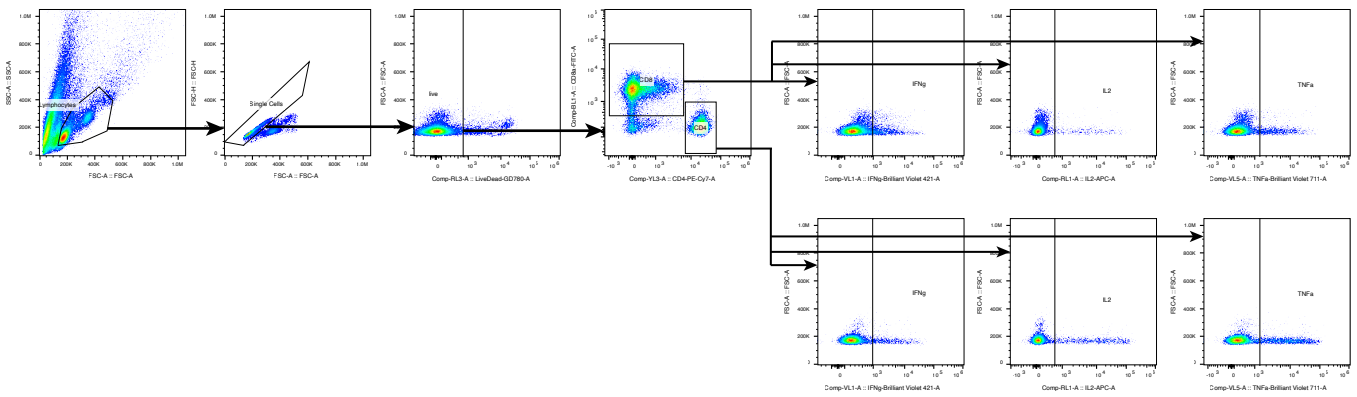

Supplement: NIHMS1967654-supplement-Supplementary_Fig__2.pdf [file NIHMS1967654-supplement-Supplementary_Fig__2.pdf]
