# Supplementary material
Source: PubMed Central journal article supplement (PMC11065414)

# Base Editing Screen Sort Gating Hierarchy

## a Figures 1, 2 and Extended Data Figures 2-5, NGG screens

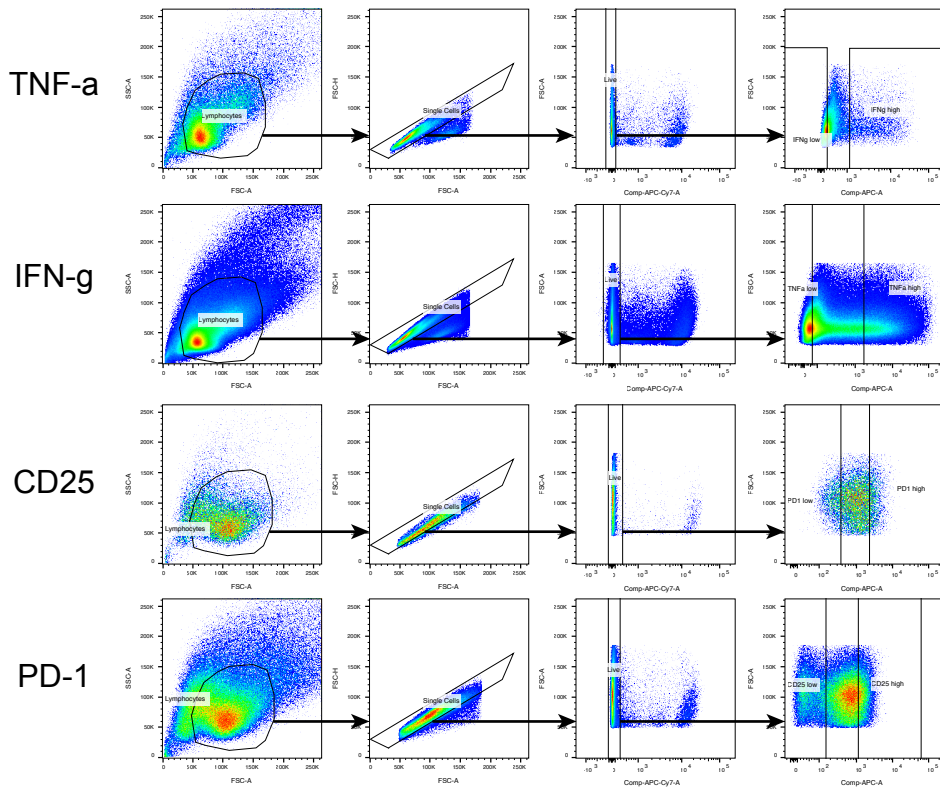

## b Figure 4 and Extended Data Figure 10, NG screen

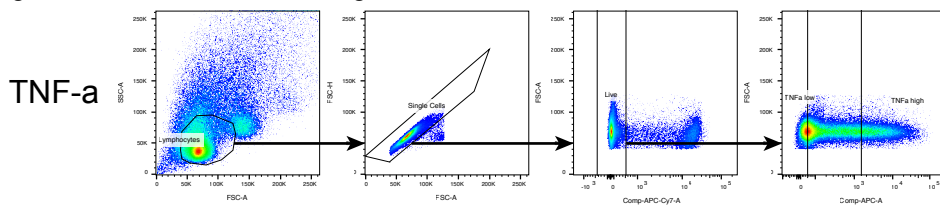

Supplement: NIHMS1967654-supplement-Supplementary_Fig__4.pdf [file NIHMS1967654-supplement-Supplementary_Fig__4.pdf]
