# Supplementary material
Source: PubMed Central journal article supplement (PMC11065414)

# Surface-Activation-Marker-Gating-Hierarchy

## a Extended-Data-Figure-7

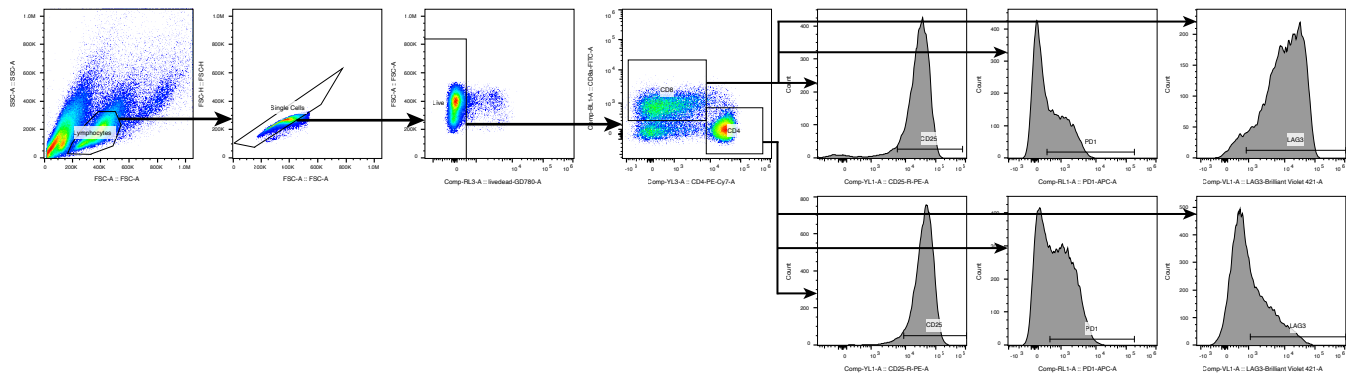

## b Extended-Data-Figure-8f

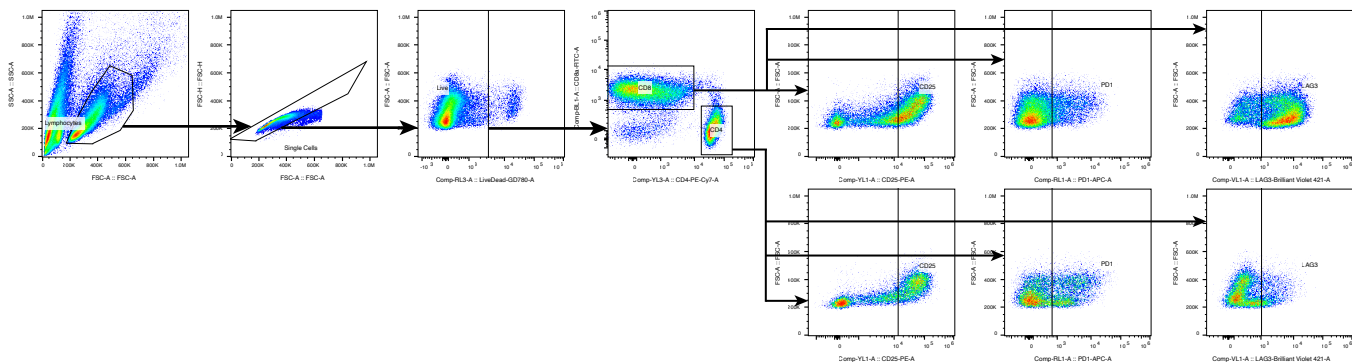

Supplement: NIHMS1967654-supplement-Supplementary_Fig__1.pdf [file NIHMS1967654-supplement-Supplementary_Fig__1.pdf]

# Gating Hierarchy for Extended Data Figure 1

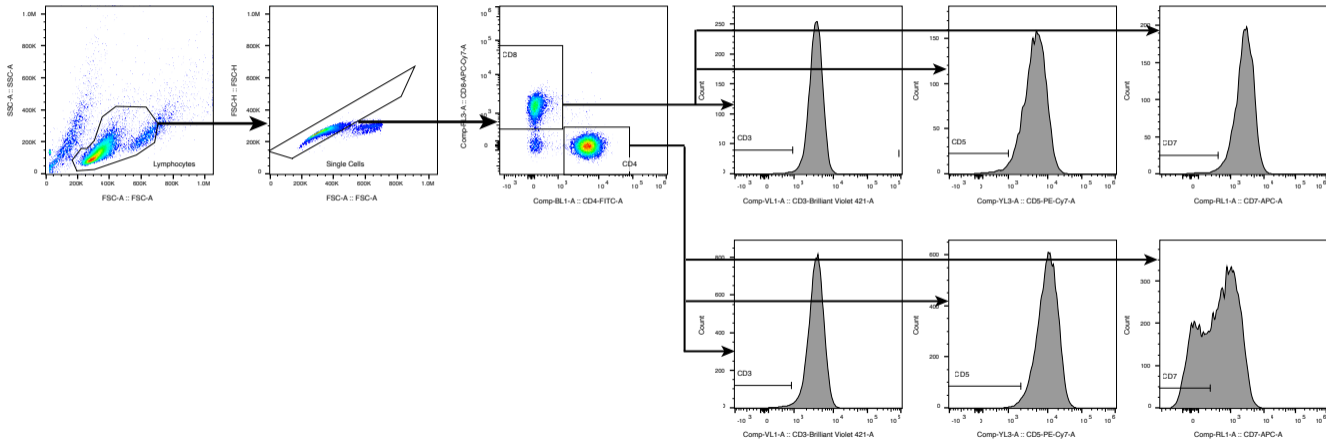

Supplement: NIHMS1967654-supplement-Supplementary_Fig__3.pdf [file NIHMS1967654-supplement-Supplementary_Fig__3.pdf]
